# Supplementary material
Source: PubMed Central journal article supplement (PMC3933926)
Supplement: NIHMS553565-supplement-01.pdf [file NIHMS553565-supplement-01.pdf]

**Table S1:** References to accompany experimental support classifications in Figure 5. Genes listed produce the described phenotype if knocked out individually by setting the associated flux or fluxes to zero.

| Gene(s)                        | Predicted Phenotype<br>(Missing Metabolites)                                                                           | Experimental Evidence and Categorization                                                                                                                                                                                                                                                                                                                                                                                                                                                                                                                                                                                                         |
|--------------------------------|------------------------------------------------------------------------------------------------------------------------|--------------------------------------------------------------------------------------------------------------------------------------------------------------------------------------------------------------------------------------------------------------------------------------------------------------------------------------------------------------------------------------------------------------------------------------------------------------------------------------------------------------------------------------------------------------------------------------------------------------------------------------------------|
| <i>pabA</i><br><i>folC,E,K</i> | 5-Methyltetrahydrofolate                                                                                               | PabA is responsible for an early step from chorismate towards folate synthesis, and strains lacking it must be supplemented with p-aminobenzoic acid (Auxotroph) [1]. FolE, FolK, and FolC participate, in order, in later folate biosynthesis. <i>E. coli</i> lacks folate transporters, but precursor p-aminobenzoic acid can be transported from the media, so strains with defects in folate production prior to p-aminobenzoic acid can be supplemented. FolE and FolK catalytic steps occur before p-aminobenzoic acid (Likely Auxotrophs) [1]. FolC is essential because it participates after p-aminobenzoic acid (Other Agreement) [1]. |
| <i>metF</i>                    | 5-Methyltetrahydrofolate<br>Methionine                                                                                 | 5-methyltetrahydrofolate is a required cofactor in methionine synthesis, and MetF is required for transitions between this and other folate forms. Strains with <i>metF</i> mutations are methionine auxotrophs; however, it is unclear whether 5-methyltetrahydrofolate is required in the presence of methionine (Partial Agreement) [2].                                                                                                                                                                                                                                                                                                      |
| <i>folA</i>                    | 5-Methyltetrahydrofolate<br>dTTP                                                                                       | Various folate-requiring products, such as methionine or thymine, do not restore growth in <i>folA</i> mutants. A number of other downstream metabolites are also required [3, 1]. An artifact of FBA allows this strain to produce methionine <i>in silico</i> (Partial Agreement) by cycling two forms of folate even though neither can be synthesized <i>de novo</i> .                                                                                                                                                                                                                                                                       |
| <i>aroA,B,C</i>                | 5-Methyltetrahydrofolate<br>Phenylalanine<br>Tryptophan<br>Tyrosine                                                    | <i>aroA</i> , <i>aroB</i> , and <i>aroC</i> gene products catalyze reactions in chorismate biosynthesis. Chorismate is required for folate cofactor and aromatic amino acid biosynthesis. These knockout strains are auxotrophs for the aromatic amino acids as well as the chorismate-derived precursors to folate and quinone biosynthesis (Auxotrophs) [4].                                                                                                                                                                                                                                                                                   |
| <i>guaA,B</i><br><i>gmk</i>    | 5-Methyltetrahydrofolate<br>dGTP<br>FAD<br>GTP                                                                         | GuaA and GuaB participate in <i>de novo</i> guanine nucleotide biosynthesis. Both knockouts are purine auxotrophs. There are additional missing metabolites because folate and flavin synthesis rely on purines as precursors (Auxotrophs) [5]. Gmk is an essential kinase and loss of its function cannot be supplemented (Other Agreement) [6].                                                                                                                                                                                                                                                                                                |
| <i>gltA</i><br><i>icd</i>      | 5-Methyltetrahydrofolate<br>Arginine<br>Glutamine<br>Glutamate<br>Proline<br>Peptidoglycan<br>Putrescine<br>Spermidine | <i>gltA</i> and <i>icd</i> knockout strains require glutamate supplement in minimal media (Auxotrophs) [7, 8]. All other metabolites absent <i>in silico</i> depend on glutamate for biosynthesis (by pathway examination).                                                                                                                                                                                                                                                                                                                                                                                                                      |

Continued on next page

Table S1: – continued from previous page

| Gene(s)                                            | Predicted Phenotype<br>(Missing Metabolites)                                          | Experimental Evidence and Categorization                                                                                                                                                                                                                                                                                                                                                                                                                                                                                                                                     |
|----------------------------------------------------|---------------------------------------------------------------------------------------|------------------------------------------------------------------------------------------------------------------------------------------------------------------------------------------------------------------------------------------------------------------------------------------------------------------------------------------------------------------------------------------------------------------------------------------------------------------------------------------------------------------------------------------------------------------------------|
| <i>panB, C, D</i><br><i>coaD</i><br><i>dfp</i>     | Acetyl-CoA<br>Coenzyme A<br>Succinyl-CoA                                              | <i>panB</i> , <i>panC</i> , and <i>panD</i> gene mutants are auxotrophic for pantothenate or beta-alanine, depending on the step being catalyzed. These intermediates contribute to Coenzyme A (CoA) biosynthesis (Auxotrophs) [9]. <i>Dfp</i> is also known as <i>CoaBC</i> , and along with <i>CoaD</i> it participates late in CoA biosynthesis (Other Agreement) [10, 11]. Strains which lack one of these gene functions slowly deplete Coenzyme A by dilution, ceasing division [12].                                                                                  |
| <i>cysC, E, H</i> ,<br>I, J, N                     | Acetyl-CoA<br>Coenzyme A<br>Cysteine<br>Methionine<br>Succinyl-CoA                    | <i>cysE</i> mutant strains require cysteine rather than other common ionic sulfur sources (Auxotroph) [13]. <i>cysC</i> and <i>cysH</i> gene products are required for growth on sulfate which is the sulfur source in our <i>in silico</i> M9 media (Auxotrophs) [13]. <i>cysI</i> , <i>cysJ</i> , and <i>cysN</i> gene products all participate in sulfur handling preceding cystine synthesis; mutants are rescued by cystine media supplement (Auxotrophs) [14]. Cystine is upstream of methionine synthesis and required for CoA synthesis.                             |
| <i>ilvC, D</i>                                     | Acetyl-CoA<br>Coenzyme A<br>Isoleucine<br>Leucine<br>Succinyl-CoA<br>Valine           | <i>IlvC</i> and <i>IlvD</i> catalyze reactions preceding the valine and leucine pathways and analogous molecular steps in isoleucine synthesis. Precursors to these amino acids are also required in CoA synthesis. Mutants of <i>ilvD</i> and <i>ilvC</i> genes are auxotrophs for both isoleucine and valine (Auxotrophs) [15, 16].                                                                                                                                                                                                                                        |
| <i>argG, H</i>                                     | Arginine                                                                              | <i>ArgG</i> and <i>ArgH</i> are responsible for the last two steps in arginine synthesis. <i>argG</i> mutant growth is limited by supplement of arginine, but grows slowly without it (Partial Agreement) [17]. <i>argH</i> mutants require arginine (Auxotroph) [18].                                                                                                                                                                                                                                                                                                       |
| <i>argA, B, C, E</i>                               | Arginine<br>Putrescine<br>Spermidine                                                  | <i>argA</i> , <i>argB</i> , <i>argC</i> , and <i>argE</i> knockout strains are arginine auxotrophs. Putrescine can be produced either from ornithine or arginine precursors, so if arginine is supplemented the polyamines can be synthesized (Auxotrophs) [19, 18, 17].                                                                                                                                                                                                                                                                                                     |
| <i>pgsA</i>                                        | Cardiolipin<br>Phosphatidylglycerol                                                   | Phosphatidylglycerophosphate synthase catalyzes the committed step in the biosynthesis of acidic phospholipids. This knockout strain experimentally lacks these two biomass constituents, and is only viable under some conditions: LB media 30°C (Other Agreement) [20].                                                                                                                                                                                                                                                                                                    |
| <i>fabA, B, Z</i><br><i>gpsA</i><br><i>plsB, C</i> | Cardiolipin<br>Phosphatidylethanolamine<br>Phosphatidylglycerol<br>Phosphatidylserine | Genes in this phenotype set participate in phospholipid and fatty acid biosynthesis. When <i>FabA</i> is inhibited the resulting growth defect is counteracted by media supplement of unsaturated fatty acids (Likely Auxotroph) [21]. <i>fabB</i> gene mutant is a fatty acid auxotroph (Auxotroph) [21]. <i>gpsA</i> and <i>plsB</i> mutant strains require glycerol or glycerol-3-phosphate to be supplied in the media for phospholipid synthesis (Auxotroph) [21]. There is no known supplement to rescue <i>fabZ</i> or <i>plsC</i> knockouts (Other Agreement). [21]. |

Continued on next page

**Table S1:** – continued from previous page

| <b>Gene(s)</b>                                      | <b>Predicted Phenotype<br/>(Missing Metabolites)</b>                                                        | <b>Experimental Evidence and Categorization</b>                                                                                                                                                                                                                                                                                                                                                                                                     |
|-----------------------------------------------------|-------------------------------------------------------------------------------------------------------------|-----------------------------------------------------------------------------------------------------------------------------------------------------------------------------------------------------------------------------------------------------------------------------------------------------------------------------------------------------------------------------------------------------------------------------------------------------|
| <i>accA,B,C,D</i><br><i>cdsA</i><br><i>fabD,G,I</i> | Cardiolipin<br>Lipopolysaccharide<br>Phosphatidylethanolamine<br>Phosphatidylglycerol<br>Phosphatidylserine | Genes in this phenotype set participate in early phospholipid and fatty acid biosynthesis. <i>fabD</i> knockouts require saturated and unsaturated fatty acid supplements (Auxotroph) [21]. <i>accA</i> , <i>accB</i> , <i>accC</i> , <i>accD</i> , <i>fabG</i> , <i>fabI</i> , and <i>cdsA</i> genes are essential for growth (Other Agreement) [21].                                                                                              |
| <i>pyrG</i>                                         | CTP<br>dCTP                                                                                                 | PyrG catalyzes the last step in <i>de novo</i> cytidine triphosphate biosynthesis. In <i>pyrG</i> mutants cytidine is required for growth, but the strain must contain an additional mutation to be viable due to toxic buildup of intermediates (Partial Agreement) [22].                                                                                                                                                                          |
| <i>pyrB,C,D,E</i>                                   | CTP<br>dCTP<br>dTTP<br>UDPglucose<br>UTP                                                                    | <i>pyrB</i> , <i>pyrC</i> , <i>pyrD</i> , and <i>pyrE</i> gene products contribute to <i>de novo</i> biosynthesis of pyrimidines, and removal of any one of these genes results in purine requirement (Auxotrophs) [22].                                                                                                                                                                                                                            |
| <i>pyrH</i>                                         | CTP<br>dCTP<br>Lipopolysaccharide<br>Peptidoglycan<br>UDPglucose<br>UTP                                     | PyrH is a uridine monophosphate kinase, and mutants of <i>pyrH</i> grow slowly without supplement (Partial Agreement) [22, 23]. Note that DTTP is still made because it can occur from precursors to UDP.                                                                                                                                                                                                                                           |
| <i>thyA</i><br><i>tmk</i>                           | dTTP                                                                                                        | ThyA is responsible for the reaction dUMP to dTMP, the main pathway of <i>de novo</i> dTMP synthesis. Mutation creates auxotrophy (Auxotroph) [22]. Tmk phosphorelates dTMP to dTDP and knockout is lethal (Other Agreement) [24].                                                                                                                                                                                                                  |
| <i>ribA,B,C,</i><br><i>D,E,F</i>                    | FAD                                                                                                         | These genes participate in the pathway of flavin biosynthesis, or, in the case of RibF, the conversion between FAD and FMN. Flavin auxotrophs of the <i>rib</i> operon are mentioned non-specifically in literature as requiring very high riboflavin supplement because specific transport mechanism is lacking (Likely Auxotrophs) [25].                                                                                                          |
| <i>hisA,B,C,D</i><br><i>F,G,I</i>                   | Histidine                                                                                                   | The genes in this operon were originally isolated as histidine auxotrophs (Auxotrophs) [26, 27, 28].                                                                                                                                                                                                                                                                                                                                                |
| <i>ilvE</i>                                         | Isoleucine                                                                                                  | IlvE catalyzes the last step in isoleucine synthesis, and strains lacking it are isoleucine auxotrophs. Such mutants are also experimentally deficient in valine production, but do not absolutely require it (Auxotroph) [15, 29].                                                                                                                                                                                                                 |
| <i>leuA,B,C,D</i>                                   | Leucine                                                                                                     | This set of genes has products which function along the linear pathway towards leucine synthesis and were originally identified from leucine auxotrophs (Auxotrophs) [30].                                                                                                                                                                                                                                                                          |
| <i>kdsA,B</i><br><i>kdtA</i><br><i>lpxA,B,C,D,K</i> | Lipopolysaccharide                                                                                          | Products of this gene set accomplish lipid A biosynthesis and LPS synthesis. Due to lipid A's role in anchoring LPS to the outer membrane it is essential and cannot be obtained from the media. <i>kdtA</i> , <i>kdsA</i> , <i>kdsB</i> , <i>lpxA</i> , <i>lpxC</i> , <i>lpxD</i> and <i>lpxK</i> knockouts are lethal (Other Agreement) [31, 32, 33, 34, 35]. <i>lpxB</i> mutants accumulate precursors but can survive (Partial Agreement) [31]. |

Continued on next page

Table S1: – continued from previous page

| Gene(s)                                   | Predicted Phenotype<br>(Missing Metabolites)                         | Experimental Evidence and Categorization                                                                                                                                                                                                                                                                                                                                                                |
|-------------------------------------------|----------------------------------------------------------------------|---------------------------------------------------------------------------------------------------------------------------------------------------------------------------------------------------------------------------------------------------------------------------------------------------------------------------------------------------------------------------------------------------------|
| <i>glmS,U</i>                             | Lipopolysaccharide<br>Peptidoglycan                                  | <i>glmS</i> mutants are auxotrophs for glucosamine or N-acetylglucosamine (Auxotroph) [36]. GlmU has two functions and both are essential (Other Agreement) [37, 38, 31]                                                                                                                                                                                                                                |
| <i>psd</i>                                | Lipopolysaccharide<br>Phosphatidylethanolamine                       | Converts phosphatidylserine (PS) to phosphatidylethanolamine (PE) lipid forms. PE is required and mutants of <i>psd</i> slowly stop growing (Other Agreement) [21, 39].                                                                                                                                                                                                                                 |
| <i>pssA</i>                               | Lipopolysaccharide<br>Phosphatidylethanolamine<br>Phosphatidylserine | Synthesizes phosphatidylserine; mutation of <i>pssA</i> is lethal (Other Agreement) [39].                                                                                                                                                                                                                                                                                                               |
| <i>lysA</i>                               | Lysine                                                               | LysA catalyzes the last step in lysine synthesis; mutants strains require lysine [40, 41].                                                                                                                                                                                                                                                                                                              |
| <i>dapA,B,D,E</i>                         | Lysine<br>Peptidoglycan                                              | Synthesis pathway towards diaminopimelate which is either converted to lysine or use in peptidoglycan synthesis. These knockout strains require diaminopimelate supplement (Auxotrophs) [40].                                                                                                                                                                                                           |
| <i>asd</i>                                | Lysine<br>Methionine<br>Peptidoglycan                                | Asd participates in lysine synthesis upstream of intermediate diaminopimelate, which either goes to lysine or peptidoglycan synthesis. A later intermediate in the pathway goes to methionine synthesis. Knockouts require diaminopimelic acid supplement, but because amino acid media was used the additional requirement for methionine was not specifically identified (Likely Auxotroph) [42, 43]. |
| <i>metA,B</i>                             | Methionine                                                           | MetA and MetB participate in middle of methionine synthesis, and strains without them are auxotrophs for methionine or other pathway intermediates [44, 2, 45].                                                                                                                                                                                                                                         |
| <i>nadA,B,C,<br/>nadE</i>                 | NAD<br>NADH<br>NADP<br>NADPH                                         | NadE is involved in <i>de novo</i> NAD <sup>+</sup> biosynthesis and salvage, catalyzing the final step of both pathways. Strains without <i>nadE</i> gene product function are unviable (Other Agreement) [46]. <i>nadA</i> , <i>nadB</i> , and <i>nadC</i> mutants are auxotrophs for pathway intermediates (Auxotrophs) [47, 46]                                                                     |
| <i>nadK</i>                               | NADP<br>NADPH                                                        | The <i>nadK</i> gene product is an essential NAD kinase (Other Agreement) [48].                                                                                                                                                                                                                                                                                                                         |
| <i>pheA</i>                               | Phenylalanine                                                        | <i>pheA</i> knockouts are phenelalanine auxotrophs (Auxotroph) [4].                                                                                                                                                                                                                                                                                                                                     |
| <i>proC</i>                               | Proline                                                              | ProC is responsible for the final step in proline biosynthesis, strains without it are auxotrophic for proline (Auxotroph) [49].                                                                                                                                                                                                                                                                        |
| <i>mraY,<br/>murA,B,C,<br/>D,E, F,G,I</i> | Peptidoglycan                                                        | Genes in this set catalyze steps in the peptidoglycan synthesis pathway. <i>murA</i> is essential and amber mutants die quickly in non-permissive conditions (Other Agreement) [50]. MurA–F are essential (Other Agreement) [51], as are <i>MraY</i> , <i>MurI</i> and <i>MurG</i> (Other Agreement) [52].                                                                                              |

Continued on next page

Table S1: – continued from previous page

| Gene(s)                   | Predicted Phenotype<br>(Missing Metabolites)                                                                                                                  | Experimental Evidence and Categorization                                                                                                                                                                                                                                                                                                                                                                                                                                                                                                 |
|---------------------------|---------------------------------------------------------------------------------------------------------------------------------------------------------------|------------------------------------------------------------------------------------------------------------------------------------------------------------------------------------------------------------------------------------------------------------------------------------------------------------------------------------------------------------------------------------------------------------------------------------------------------------------------------------------------------------------------------------------|
| <i>metK</i>               | Spermidine                                                                                                                                                    | The essentiality prediction appears consistent, but the predicted cause is not correct. In simulation, knockout prevents spermidine from being synthesized. However, spermidine is not a strictly essential metabolite [53]. Many other reactions (heme, quinone, biotin synthesis by examination of metabolic network) require the product of this reaction, and the gene is essential experimentally (Incorrect) [54].                                                                                                                 |
| <i>trpA,B,C,D,E</i>       | Tryptophan                                                                                                                                                    | Gene products of <i>trpA</i> through <i>E</i> participate in the pathway of tryptophan synthesis, and their mutants are tryptophan auxotrophs (Auxotrophs) [55].                                                                                                                                                                                                                                                                                                                                                                         |
| <i>tyrA</i>               | Tyrosine                                                                                                                                                      | The <i>tyrA</i> knockout is a tyrosine auxotroph (Auxotroph) [4]                                                                                                                                                                                                                                                                                                                                                                                                                                                                         |
| <i>serA,B,C</i>           | All Biomass Metabolites,<br>Severely impacted long-time:<br>Acetyl-CoA<br>Coenzyme A<br>Cystine<br>Methionine<br>Phosphatidylserine<br>Serine<br>Succinyl-CoA | This set of gene knockouts are serine auxotrophs, but computationally exhibit total metabolism failure which is due to interference with cycling (Partial Agreement) [56].                                                                                                                                                                                                                                                                                                                                                               |
| <i>ppa</i><br><i>prsA</i> | All Biomass Metabolites                                                                                                                                       | Knockout of <i>ppa</i> or <i>prsA</i> genes computationally interferes with cycling in central metabolism, resulting in no function of the network in the short or long timescale. <i>ppa</i> codes for a pyrophosphatase which is essential, but the strains arrest slowly and not with an immediate cessation of all metabolism (Incorrect) [57, 50]. <i>prsA</i> (a.k.a. <i>prs</i> ) removal creates a requirement for a number of purine and pyrimidine end products, but does not inhibit all metabolic function (Incorrect) [58]. |
| <i>pgk</i>                | All Biomass Metabolites<br>Decreased Moderately                                                                                                               | Pgk functions in central metabolism and is essential. In contrast, the simulation can largely bypass its function with pathways that in reality do not compensate for loss of Pgk. (Incorrect) [59].                                                                                                                                                                                                                                                                                                                                     |
| <i>atpB,C,E</i>           | All Biomass Metabolites<br>Decreased                                                                                                                          | <i>atpB</i> , <i>C</i> and, <i>E</i> are components of the membrane bound ATP synthase, and are among the few genes that produce an intermediate growth rate in FBA simulations based on the loss of efficiency in conversion of carbon substrate with the loss of the electron transport chain. Strains without these genes survive experimentally, albeit with slow growth (Other Agreement) [60].                                                                                                                                     |

Continued on next page

Table S1: – continued from previous page

| Gene(s)                                                                       | Predicted Phenotype<br>(Missing Metabolites) | Experimental Evidence and Categorization                                                                                                                                                                                                                                                                                                                                                                                                                                                                          |
|-------------------------------------------------------------------------------|----------------------------------------------|-------------------------------------------------------------------------------------------------------------------------------------------------------------------------------------------------------------------------------------------------------------------------------------------------------------------------------------------------------------------------------------------------------------------------------------------------------------------------------------------------------------------|
| <i>purH</i>                                                                   | Histidine (Short Time)<br>All (Steady State) | PurH performs the last steps in <i>de novo</i> purine synthesis, so blockage eventually leads to metabolism shutdown as purines are sequestered in biomass and cannot be synthesized as energy carriers. Immediate Histidine restriction is that purine synthesis consumes a side product of histidine synthesis which becomes a dead end when purine synthesis is blocked, which is partially consistent with experimental evidence [61]. <i>purH</i> is reported as a purine auxotroph (Partial Agreement) [6]. |
| <i>purA,B,C,D,E</i> , All Biomass Metabolites<br><i>F,K,L,M</i><br><i>adk</i> |                                              | Removal of the <i>pur</i> genes removes the ability to synthesize purines, without which metabolism eventually shuts down as energy carriers are depleted by inclusion of purines in cell mass. PurB is the next-to-last step in the pathway towards IMP, and also completes synthesis of AMP. All these <i>pur</i> gene knockouts in this set produce purine auxotrophs (Auxotrophs) [6]. The <i>adk</i> product is an AMP kinase and is essential (Other Agreement) [6].                                        |

## References

- [1] J. Green, B. Nichols, Folate biosynthesis, reduction, and polyglutamylation, in: *Escherichia coli and Salmonella.*, American Society for Microbiology, Washington, DC, 1996, p. 90.
- [2] J. T. Mulligan, W. Margolin, J. H. Krueger, G. C. Walker, Mutations affecting regulation of methionine biosynthetic genes isolated by use of met-lac fusions., *The Journal of Bacteriology* 151 (2) (1982) 609–619.
- [3] M. B. Herrington, N. T. Chirwa, Growth properties of a *folA* null mutant of *Escherichia coli* K12., *Can. J. Microbiol.* 45 (3) (1999) 191–200.
- [4] J. Pittard, B. J. Wallace, Distribution and function of genes concerned with aromatic biosynthesis in *Escherichia coli.*, *The Journal of Bacteriology* 91 (4) (1966) 1494–1508.
- [5] P. R. Lambden, W. T. Drabble, The *gua* operon of *Escherichia coli* K-12: evidence for polarity from *guaB* to *guaA.*, *The Journal of Bacteriology* 115 (3) (1973) 992–1002.
- [6] H. Zalkin, Biosynthesis of purine nucleotides, in: *Escherichia coli and Salmonella.*, American Society for Microbiology, Washington, DC, 1996.
- [7] T. M. Lakshmi, R. B. Helling, Selection for citrate synthase deficiency in *icd* mutants of *Escherichia coli.*, *The Journal of Bacteriology* 127 (1) (1976) 76–83.
- [8] M. J. Gruer, A. J. Bradbury, J. R. Guest, Construction and properties of aconitase mutants of *Escherichia coli.*, *J Gen Microbiol* 143 ( Pt 6) (1997) 1837–1846.
- [9] J. E. Cronan, K. J. Littel, S. Jackowski, Genetic and biochemical analyses of pantothenate biosynthesis in *Escherichia coli* and *Salmonella typhimurium.*, *The Journal of Bacteriology* 149 (3) (1982) 916–922.
- [10] E. D. Spitzer, B. Weiss, *dfp* Gene of *Escherichia coli* K-12, a locus affecting DNA synthesis, codes for a flavoprotein., *The Journal of Bacteriology* 164 (3) (1985) 994–1003.

- [11] C. Freiberg, B. Wieland, F. Spaltmann, K. Ehlert, H. Brötz, H. Labischinski, Identification of novel essential *Escherichia coli* genes conserved among pathogenic bacteria., *J Mol Microbiol Biotechnol* 3 (3) (2001) 483–489.
- [12] S. Jackowski, C. O. Rock, Regulation of coenzyme A biosynthesis., *The Journal of Bacteriology* 148 (3) (1981) 926–932.
- [13] M. C. Jones-Mortimer, Positive control of sulphate reduction in *Escherichia coli*. Isolation, characterization and mapping of cysteineless mutants of *E. coli* K 12, *Biochemical Journal* 110 (3) (1968) 589.
- [14] N. Kredich, Biosynthesis of cysteine, in: *Escherichia coli and Salmonella.*, American Society for Microbiology, Washington, DC, 1996.
- [15] C. M. Berg, K. J. Shaw, J. Vender, M. Borucka-Mankiewicz, Physiological characterization of polar Tn5-induced isoleucine-valine auxotrophs in *Escherichia coli* K.12: evidence for an internal promoter in the *ilvOGEDA* operon., *Genetics* 93 (2) (1979) 308–319.
- [16] S. Jackowski, Biosynthesis of pantothenic acid and coenzyme A, in: *Escherichia coli and Salmonella.*, American Society for Microbiology, Washington, DC, 1996.
- [17] N. Glansdorff, Biosynthesis of arginine and polyamines, in: *Escherichia coli and Salmonella.*, American Society for Microbiology, Washington, DC, 1996, p. 680.
- [18] M. Crabeel, D. Charlier, R. Cunin, A. Boyen, N. Glansdorff, A. Piérard, Accumulation of arginine precursors in *Escherichia coli*: effects on growth, enzyme repression, and application to the forward selection of arginine auxotrophs., *The Journal of Bacteriology* 123 (3) (1975) 898–904.
- [19] A. Mountain, N. H. Mann, R. N. Munton, S. Baumberg, Cloning of a *Bacillus subtilis* restriction fragment complementing auxotrophic mutants of eight *Escherichia coli* genes of arginine biosynthesis., *Mol Gen Genet* 197 (1) (1984) 82–89.
- [20] E. Mileykovskaya, A. C. Ryan, X. Mo, C.-C. Lin, K. I. Khalaf, W. Dowhan, T. A. Garrett, Phosphatidic acid and N-acylphosphatidylethanolamine form membrane domains in *Escherichia coli* mutant lacking cardiolipin and phosphatidylglycerol., *J Biol Chem* 284 (5) (2009) 2990–3000.
- [21] J. Cronan Jr, Biosynthesis of membrane lipids, in: *Escherichia coli and Salmonella.*, American Society for Microbiology, Washington, DC, 1996.
- [22] J. Neuhard, Biosynthesis and conversions of pyrimidines, in: *Escherichia coli and Salmonella.*, American Society for Microbiology, Washington, DC, 1996, p. 680.
- [23] A. Piérard, N. Glansdorff, D. Gigot, M. Crabeel, P. Halleux, L. Thiry, Repression of *Escherichia coli* carbamoylphosphate synthase: relationships with enzyme synthesis in the arginine and pyrimidine pathways., *The Journal of Bacteriology* 127 (1) (1976) 291–301.
- [24] D.-N. Chaperon, Construction and complementation of in-frame deletions of the essential *Escherichia coli* thymidylate kinase gene., *Appl Environ Microbiol* 72 (2) (2006) 1288–1294.
- [25] A. Bacher, S. Eberhardt, G. Richter, Biosynthesis of Riboflavin, in: *Escherichia coli and Salmonella.*, American Society for Microbiology, Washington, DC, 1996, pp. 1–12.
- [26] P. Alifano, R. Fani, P. Liò, A. Lazcano, M. Bazzicalupo, M. S. Carlomagno, C. B. Bruni, Histidine biosynthetic pathway and genes: structure, regulation, and evolution., *Microbiol Rev* 60 (1) (1996) 44–69.
- [27] M. Winkler, Biosynthesis of histidine, in: *Escherichia coli and Salmonella.*, American Society for Microbiology, Washington, DC, 1996.

- [28] E. P. Goldschmidt, M. S. Cater, T. S. Matney, M. A. Butler, A. Greene, Genetic analysis of the histidine operon in *Escherichia coli* K12., *Genetics* 66 (2) (1970) 219–229.
- [29] H. Umbarger, Biosynthesis of the branched-chain amino acids, in: *Escherichia coli and Salmonella.*, American Society for Microbiology, Washington, DC, 1996, p. 1654.
- [30] J. M. Somers, A. Amzallag, R. B. Middleton, Genetic fine structure of the leucine operon of *Escherichia coli* K-12., *The Journal of Bacteriology* 113 (3) (1973) 1268–1272.
- [31] C. Raetz, Bacterial lipopolysaccharides: a remarkable family of bioactive macroamphiphiles, in: *Escherichia coli and Salmonella.*, American Society for Microbiology, Washington, DC, 1996.
- [32] T. A. Garrett, Accumulation of a Lipid A Precursor Lacking the 4'-Phosphate following Inactivation of the *Escherichia coli* lpxK Gene, *Journal of Biological Chemistry* 273 (20) (1998) 12457–12465.
- [33] R. Vuorio, T. Härkönen, M. Tolvanen, M. Vaara, The novel hexapeptide motif found in the acyltransferases LpxA and LpxD of lipid A biosynthesis is conserved in various bacteria., *FEBS Letters* 337 (3) (1994) 289–292.
- [34] H. Fujishima, A. Nishimura, M. Wachi, H. Takagi, T. Hirasawa, H. Teraoka, K. Nishimori, T. Kawabata, K. Nishikawa, K. Nagai, kdsA mutations affect FtsZ-ring formation in *Escherichia coli* K-12., *J Gen Microbiol* 148 (Pt 1) (2002) 103–112.
- [35] T. Baba, T. Ara, M. Hasegawa, Y. Takai, Y. Okumura, M. Baba, K. Datsenko, M. Tomita, B. Wanner, H. Mori, Construction of *Escherichia coli* K-12 in-frame, single-gene knockout mutants: the Keio collection, *Molecular Systems Biology* 2 (1).
- [36] H. C. Wu, T. C. Wu, Isolation and characterization of a glucosamine-requiring mutant of *Escherichia coli* K-12 defective in glucosamine-6-phosphate synthetase., *The Journal of Bacteriology* 105 (2) (1971) 455–466.
- [37] K. Brown, F. Pompeo, S. Dixon, D. Mengin-Lecreux, C. Cambillau, Y. Bourne, Crystal structure of the bifunctional N-acetylglucosamine 1-phosphate uridyltransferase from *Escherichia coli*: a paradigm for the related pyrophosphorylase superfamily., *The EMBO Journal* 18 (15) (1999) 4096–4107.
- [38] F. Pompeo, Y. Bourne, J. Van Heijenoort, F. Fassy, D. Mengin-Lecreux, Dissection of the bifunctional *Escherichia coli* N-acetylglucosamine-1-phosphate uridyltransferase enzyme into autonomously functional domains and evidence that trimerization is absolutely required for glucosamine-1-phosphate acetyltransferase activity and cell growth., *J Biol Chem* 276 (6) (2001) 3833–3839.
- [39] R. Kadner, Cytoplasmic membrane, in: *Escherichia coli and Salmonella.*, American Society for Microbiology, Washington, DC, 1996, p. 935.
- [40] A. I. Bukhari, A. L. Taylor, Genetic analysis of diaminopimelic acid- and lysine-requiring mutants of *Escherichia coli.*, *The Journal of Bacteriology* 105 (3) (1971) 844–854.
- [41] J. Patte, Biosynthesis of threonine and lysine, in: *Escherichia coli and Salmonella.*, American Society for Microbiology, Washington, DC, 1996.
- [42] A. J. McCoy, N. E. Adams, A. O. Hudson, C. Gilvarg, T. Leustek, A. T. Maurelli, L. L-diaminopimelate aminotransferase, a trans-kingdom enzyme shared by *Chlamydia* and plants for synthesis of diaminopimelate/lysine, *Proc Natl Acad Sci USA* 103 (47) (2006) 17909–17914.
- [43] T. T. Hoang, S. Williams, H. P. Schweizer, J. S. Lam, Molecular genetic analysis of the region containing the essential *Pseudomonas aeruginosa* asd gene encoding aspartate-beta-semialdehyde dehydrogenase., *J Gen Microbiol* 143 ( Pt 3) (1997) 899–907.



- [44] W. A. Hendrickson, J. R. Horton, D. M. LeMaster, Selenomethionyl proteins produced for analysis by multiwavelength anomalous diffraction (MAD): a vehicle for direct determination of three-dimensional structure., *The EMBO Journal* 9 (5) (1990) 1665.
- [45] R. Greene, Biosynthesis of methionine, in: *Escherichia coli and Salmonella.*, American Society for Microbiology, Washington, DC, 1996.
- [46] T. Penfound, Biosynthesis and recycling of NAD, in: *Escherichia coli and Salmonella.*, American Society for Microbiology, Washington, DC, 1996.
- [47] J. W. Foster, A. G. Moat, Nicotinamide adenine dinucleotide biosynthesis and pyridine nucleotide cycle metabolism in microbial systems., *Microbiol Rev* 44 (1) (1980) 83–105.
- [48] S. Kawai, S. Mori, T. Mukai, W. Hashimoto, K. Murata, Molecular characterization of *Escherichia coli* NAD kinase., *Eur. J. Biochem.* 268 (15) (2001) 4359–4365.
- [49] T. Leisinger, Biosynthesis of proline, in: *Escherichia coli and Salmonella.*, American Society for Microbiology, Washington, DC, 1996.
- [50] C. D. Herring, F. R. Blattner, Conditional Lethal Amber Mutations in Essential *Escherichia coli* Genes, *The Journal of Bacteriology* 186 (9) (2004) 2673–2681.
- [51] A. El Zoeiby, F. Sanschagrín, R. C. Levesque, Structure and function of the Mur enzymes: development of novel inhibitors., *Molecular Microbiology* 47 (1) (2003) 1–12.
- [52] J. Van Heijenoort, Murein synthesis, in: *Escherichia coli and Salmonella.*, American Society for Microbiology, Washington, DC, 1996.
- [53] C. W. Tabor, H. Tabor, Polyamines in microorganisms., *Microbiol Rev* 49 (1) (1985) 81.
- [54] Y. Wei, E. B. Newman, Studies on the role of the *metK* gene product of *Escherichia coli* K-12, *Molecular Microbiology* 43 (6) (2002) 1651–1656.
- [55] C. Yanofsky, E. S. Lennox, Transduction and recombination study of linkage relationships among the genes controlling tryptophan synthesis in *Escherichia coli.*, *Virology* 8 (1959) 425–447.
- [56] G. Stauffer, Biosynthesis of serine, glycine, and one-carbon units, in: *Escherichia coli and Salmonella.*, American Society for Microbiology, Washington, DC, 1996, p. 680.
- [57] J. Chen, A. Brevet, M. Fromant, F. Lévêque, J. M. Schmitter, S. Blanquet, P. Plateau, Pyrophosphatase is essential for growth of *Escherichia coli.*, *The Journal of Bacteriology* 172 (10) (1990) 5686–5689.
- [58] B. Hove-Jensen, Mutation in the phosphoribosylpyrophosphate synthetase gene (*prs*) that results in simultaneous requirements for purine and pyrimidine nucleosides, nicotinamide nucleotide, histidine, and tryptophan in *Escherichia coli.*, *The Journal of Bacteriology* 170 (3) (1988) 1148–1152.
- [59] B. Wanner, Phosphorus assimilation and control of the phosphate regulon, in: *Escherichia coli and Salmonella.*, American Society for Microbiology, Washington, DC, 1996.
- [60] M. Riley, B. Labedan, *Escherichia coli* Gene Products: Physiological Functions and Common Ancestries, in: *Escherichia coli and Salmonella.*, American Society for Microbiology, Washington, DC, 1996, pp. 1–159.
- [61] S. Allen, J. L. Zilles, D. M. Downs, Metabolic flux in both the purine mononucleotide and histidine biosynthetic pathways can influence synthesis of the hydroxymethyl pyrimidine moiety of thiamine in *Salmonella enterica.*, *The Journal of Bacteriology* 184 (22) (2002) 6130–6137.
