# Supplementary material
Source: PubMed Central journal article supplement (PMC3933926)
Supplement: NIHMS553565-supplement-02.pdf [file NIHMS553565-supplement-02.pdf]

Figure S1: Feasible  $\gamma$  (gamma) parameter ranges for flexFBA of the iMC1010 *E. coli* metabolic network, including those frustrated by many knockdowns. For each ‘number of knockdowns’  $N$ , a randomly selected  $N$  of the  $f_i$  fluxes were constrained with an upper bound of 10% the wild-type value. Random selection was repeated for 10 random samples at each  $N$ . Networks were then simulated at many  $\gamma$  values, and visualized as follows: a green line extends from the first value of  $\gamma$  at which all unconstrained  $f_i = f_{atp}$ , to the highest; a grey line extends over the  $\gamma$  range for which all  $f_i = \bar{f}$  of the biomass reaction; black indicates all  $f_i = 0$  and extends across  $\gamma$  greater than those shown. Regions without markings (whitespace at low  $\gamma$ ) are characterized by nonzero  $f_{atp}$ , but where some subset of unconstrained  $f_i$  are 0. Selection and simulation procedure was carried out for three growth rates  $\mu$ , meaning three different  $f_{atp}$  values, set via change in the glucose and oxygen uptake rates flux bounds which produce: (A)  $\mu_{low} = 0.3/h$  which is about half the glucose growth rate; (B)  $\mu_{mid} = 0.69/h$  corresponding to aerobic growth on glucose minimal media; (C)  $\mu_{high} = 1.42/h$  which is about twice the glucose growth rate.
